# Supplementary material
Source: publisher figshare collection journal article supplement (https://springernature.figshare.com/ndownloader/files/20990577)
Supplement: Supplementary file [file 20990577]

[illegible]
